# Supplementary material for: Spatial Analysis of Flood Exposure and Vulnerability for Planning More Equal Mitigation Actions
Source: MDPI journal article supplement (doi:10.3390/su15107957), 2023-05-12
Supplement: s1 [file s1]

## SUPPLEMENTARY MATERIALS

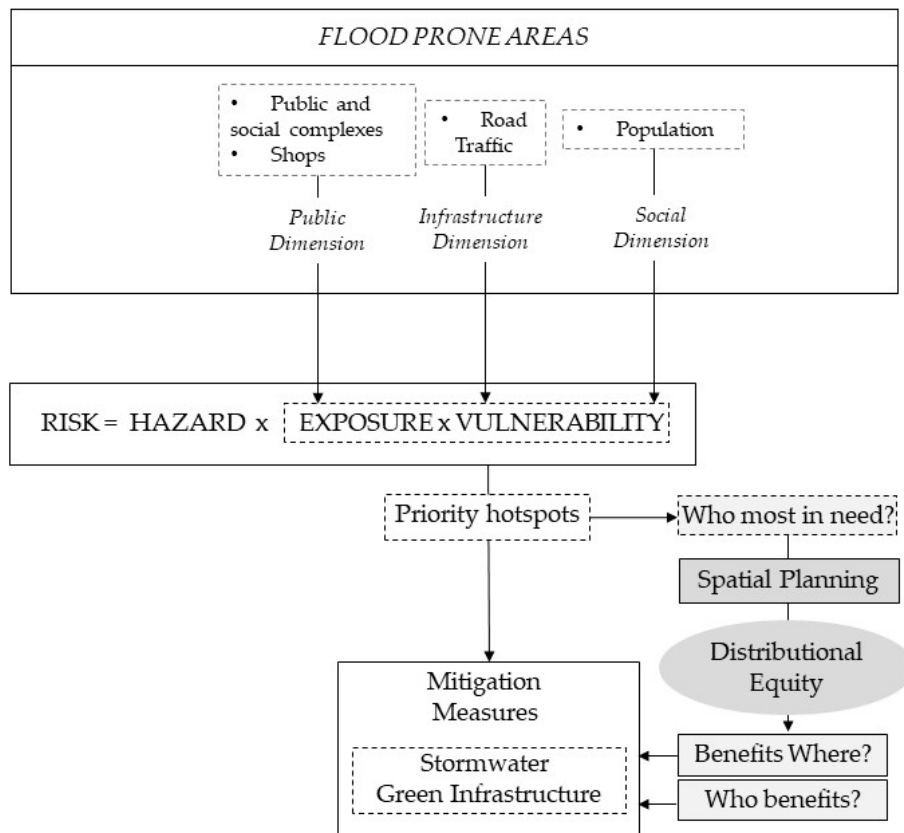

**Figure S1-** hierarchy and relations of researched topics: In flood prone areas different dimensions of exposure and vulnerability contribute to the risk level. Urban flooding mitigation results more urgent for hotspots of high levels of hazard, exposure and vulnerability. The identification of priority areas is fundamental to address distributional equity issues in planning mitigation solutions such us stormwater green infrastructure. Dashed boxes refer to components of the proposed methodology; greyed boxes line up the topic of equity in spatial planning to the methodology process.

**Table S1-** the matrix for the identification of classes of risk: R4 for very high risk; R3 for high risk; R2 for medium risk; R1 for moderate risk; P1 for Low Probability Hazard Scenario-Return Period of 300 yr; P2 for Medium Probability Hazard Scenario-Return Period of 100yr; P1 for Low Probability hazard Scenario-Return Period of 50yr; D1 to D4 for increasing value of potential damage. Source: Distretto Sicilia (2021), Aggiornamento e revisione del Piano di Gestione del rischio di alluvione redatto ai sensi dell’art. 7 del D.lgs. 49/2010 attuativo della Dir. 2007/60/CE – II ciclo di gestione. Relazione Metodologica.

| RISK CLASSIFICATION |    | HAZARD |    |    |
|---------------------|----|--------|----|----|
|                     |    | P3     | P2 | P1 |
| DAMAGE              | D4 | R4     | R4 | R3 |
|                     | D3 | R4     | R3 | R2 |
|                     | D2 | R2     | R2 | R1 |
|                     | D1 | R2     | R1 | R1 |
